# Supplementary material for: Characterization of Aliphatic Polyesters Synthesized via Enzymatic Ring-Opening Polymerization in Ionic Liquids
Source: PubMed Central journal article supplement (PMC6152688; doi:10.3390/molecules22060923), 2017-06-02
Supplement: molecules-22-00923-s001.pdf [file molecules-22-00923-s001.pdf]

## Supplementary material

Article

# Characterization of Aliphatic Polyesters Synthesized *via* Enzymatic Ring-Opening Polymerization in Ionic Liquids

Urszula Piotrowska <sup>1,2,\*</sup>, Marcin Sobczak <sup>1,2</sup> and Ewa Oledzka<sup>1</sup>

<sup>1</sup> Department of Biomaterials Chemistry, Chair of Inorganic and Analytical Chemistry, Faculty of Pharmacy with the Laboratory Medicine Division, Medical University of Warsaw, 1 Banacha St., Warsaw 02-097, Poland; [marcin.sobczak@wp.pl](mailto:marcin.sobczak@wp.pl) (M.S.); [eoledzka@wum.edu.pl](mailto:eoledzka@wum.edu.pl) (E.O.)

<sup>2</sup> Department of Organic Chemistry and Biochemistry, Faculty of Materials Science and Design, Kazimierz Pulaski University of Technology and Humanities in Radom, 27 Chrobrego St., Radom 26-600, Poland

\* Correspondence: [upiotrowska@wum.edu.pl](mailto:upiotrowska@wum.edu.pl) or [piotrowska\\_urszula@wp.pl](mailto:piotrowska_urszula@wp.pl); Tel.: +48-22-572-07-55 (U.P.)

### Materials and methods

*Thermal characterization of ionic liquids (ILs).*

Thermal properties of the ionic liquids were analyzed by thermogravimetric analysis (TGA) on TA Instruments Q50 (New Castle, DE USA). Samples (*ca.* 15 mg weight) were heated from room temperature to 700 °C at 10 °C·min<sup>-1</sup> under nitrogen flow with a purge rate of 60 mL·min<sup>-1</sup>.

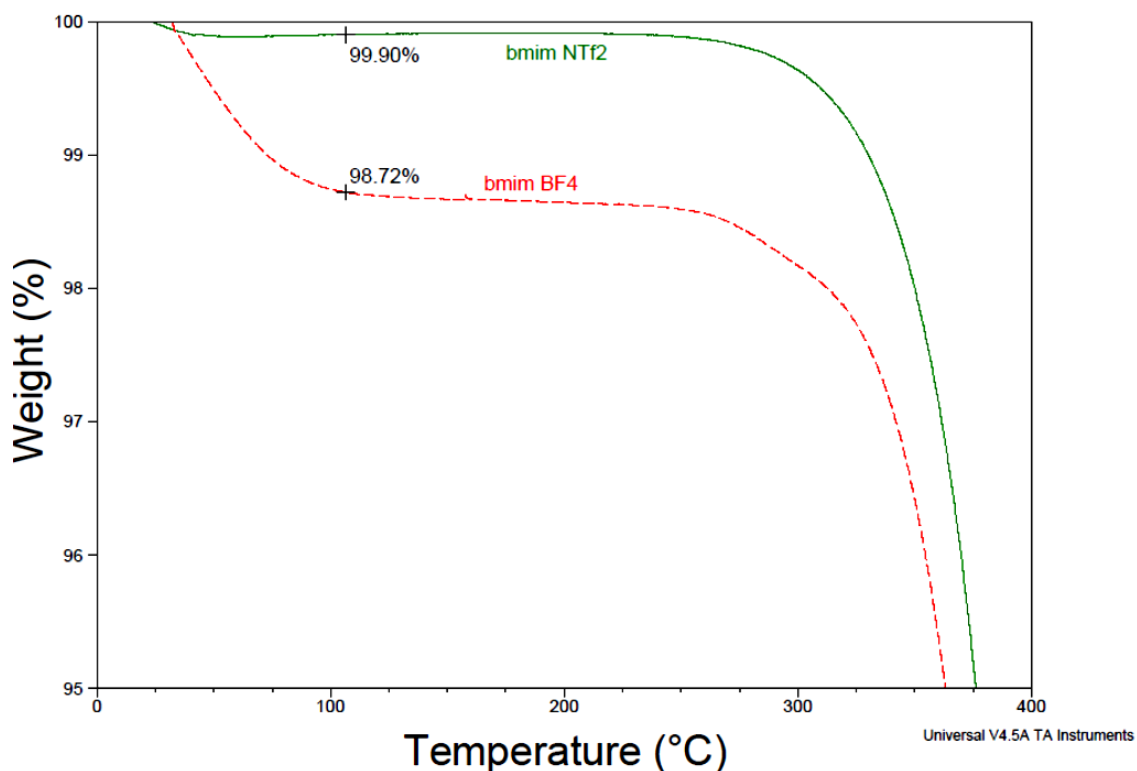

**Figure S1** Thermogravimetric analysis of ILs.
